# Supplementary material
Source: Elsevier journal article supplement (https://www.sciencedirect.com/science/article/pii/S0375090621001117)
Supplement: mmc1 [file S0375090621001117:mmc1.doc]

MATERIAL SUPLEMENTARIO

Material y métodos:

Preparación el PEG: Una medida de 17 g fue disuelta en 8 onzas de alguna bebida (agua natural, agua saborizada, jugo, leche). Las dosis grandes fueron divididas en dos o tres tomas para facilitar su ingesta. De acuerdo al instructivo escrito los familiares aumentaron la dosis en caso de presentar evacuaciones formadas o infrecuentes (<1/día) o la disminuyeron si las heces fueron líquidas o muy numerosas (>3/día). Los cambios se hicieron con pequeñas cantidades: 5 g disueltos en 2 onzas cada 3 días

.

Preparación del LM: Las dosis grandes fueron divididas en dos o tres tomas de ser necesario, para facilitar la ingesta, sola o mezclada con líquidos o alimentos saborizados. De acuerdo al instructivo escrito, los familiares aumentaron la dosis en caso de presentar evacuaciones formadas o infrecuentes (<1/día) ola disminuyeron si las heces fueron líquidas o muy numerosas (>3/día). Los cambios se hicieron con pequeñas cantidades: 5 ml cada 3 días.

Ambas preparaciones fueron administradas por vía oral durante 12 meses.

Las visitas subsecuentes fueron a uno, tres, seis, nueve y 12 meses del ingreso. En cada visita se determinó la historia entre citas, se revisa ron y discutieron los diarios, se revisaron los envases de los laxantes y se verificó que las dosis recibidas fueran las correctas, se hizo una exploración física minuciosa, se revisaron los estudios de laboratorio correspondientes y se ajustó la dosis de laxante de acuerdo a lo previsto. Toda esta información se recolectó en formatos específicos para cada visita. En los casos de pacientes que no acudieron a alguna de las visitas subsecuentes, se obtuvieron los datos vía telefónica y se dieron las recomendaciones sobre el ajuste de las dosis, frecuencia para sentarse en el baño, así como se trató de sensibilizar a los familiares para que acudieran con el niño a las siguientes visitas. De la historia y los diarios de evacuaciones se obtuvieron los siguientes datos: dosis administrada del laxante , número de dosis del laxante rechazadas, frecuencia de evacuaciones, frecuencia de episodios de IF, impactación fecal, dolor abdominal, número de enemas requeridas, número de dosis utilizadas de otro laxante y eventos adversos.
